# Supplementary material
Source: HighWire-hosted journal article supplement (https://innovations.bmj.com/content/7/1/123)
Supplement: inline-supplementary-material-1 [file inline-supplementary-material-1.pdf]

## Appendix 1

### 1.1 Search strategy EMBASE

Database: Embase <1974 to 2019 January 18>

Search Strategy:

- 
- 1 exp health care access/ or exp health care delivery/ (2913739)
  - 2 exp gene therapy/ (78311)
  - 3 gene therapy.mp. [mp=title, abstract, heading word, drug trade name, original title, device manufacturer, drug manufacturer, device trade name, keyword, floating subheading word, candidate term word] (91990)
  - 4 genetic therapy.mp. [mp=title, abstract, heading word, drug trade name, original title, device manufacturer, drug manufacturer, device trade name, keyword, floating subheading word, candidate term word] (575)
  - 5 viral therapy.mp. [mp=title, abstract, heading word, drug trade name, original title, device manufacturer, drug manufacturer, device trade name, keyword, floating subheading word, candidate term word] (1718)
  - 6 recombinant nucleic acid.mp. [mp=title, abstract, heading word, drug trade name, original title, device manufacturer, drug manufacturer, device trade name, keyword, floating subheading word, candidate term word] (19)
  - 7 DNA therapy.mp. [mp=title, abstract, heading word, drug trade name, original title, device manufacturer, drug manufacturer, device trade name, keyword, floating subheading word, candidate term word] (47)

8 recombinant DNA.mp. [mp=title, abstract, heading word, drug trade name, original title, device manufacturer, drug manufacturer, device trade name, keyword, floating subheading word, candidate term word] (23441)

9 nucleic acid therapy.mp. [mp=title, abstract, heading word, drug trade name, original title, device manufacturer, drug manufacturer, device trade name, keyword, floating subheading word, candidate term word] (46)

10 RNA therapy.mp. [mp=title, abstract, heading word, drug trade name, original title, device manufacturer, drug manufacturer, device trade name, keyword, floating subheading word, candidate term word] (107)

11 Gene Transfer Techniques.mp. [mp=title, abstract, heading word, drug trade name, original title, device manufacturer, drug manufacturer, device trade name, keyword, floating subheading word, candidate term word] (466)

12 DNA Viruses.mp. [mp=title, abstract, heading word, drug trade name, original title, device manufacturer, drug manufacturer, device trade name, keyword, floating subheading word, candidate term word] (3475)

13 RNA Viruses.mp. [mp=title, abstract, heading word, drug trade name, original title, device manufacturer, drug manufacturer, device trade name, keyword, floating subheading word, candidate term word] (7197)

14 Genetic Vector.mp. [mp=title, abstract, heading word, drug trade name, original title, device manufacturer, drug manufacturer, device trade name, keyword, floating subheading word, candidate term word] (55)

15 2 or 3 or 4 or 5 or 6 or 7 or 8 or 9 or 10 or 11 or 12 or 13 or 14 (131367)

16 Market.mp. [mp=title, abstract, heading word, drug trade name, original title, device manufacturer, drug manufacturer, device trade name, keyword, floating subheading word, candidate term word] (89054)

17 patient.mp. [mp=title, abstract, heading word, drug trade name, original title, device manufacturer, drug manufacturer, device trade name, keyword, floating subheading word, candidate term word] (5159673)

18 healthcare.mp. [mp=title, abstract, heading word, drug trade name, original title, device manufacturer, drug manufacturer, device trade name, keyword, floating subheading word, candidate term word] (328210)

19 medicines.mp. [mp=title, abstract, heading word, drug trade name, original title, device manufacturer, drug manufacturer, device trade name, keyword, floating subheading word, candidate term word] (71975)

20 drugs.mp. [mp=title, abstract, heading word, drug trade name, original title, device manufacturer, drug manufacturer, device trade name, keyword, floating subheading word, candidate term word] (938723)

21 pharmaceuticals.mp. [mp=title, abstract, heading word, drug trade name, original title, device manufacturer, drug manufacturer, device trade name, keyword, floating subheading word, candidate term word] (47428)

22 16 or 17 or 18 or 19 or 20 or 21 (6180165)

23 Access.mp. [mp=title, abstract, heading word, drug trade name, original title, device manufacturer, drug manufacturer, device trade name, keyword, floating subheading word, candidate term word] (428847)

24 availability.mp. [mp=title, abstract, heading word, drug trade name, original title, device manufacturer, drug manufacturer, device trade name, keyword, floating subheading word, candidate term word] (245933)

25 accessibility.mp. [mp=title, abstract, heading word, drug trade name, original title, device manufacturer, drug manufacturer, device trade name, keyword, floating subheading word, candidate term word] (45388)

26 23 or 24 or 25 (686811)

27 22 and 26 (253478)

28 1 or 27 (3067123)

29 15 and 28 (4355)

\*\*\*\*\*

## 1.2 Search strategy MEDLINE

("health services accessibility"[MeSH Terms] OR ((((((Market[All Fields] OR ("patients"[MeSH Terms] OR "patients"[All Fields] OR "patient"[All Fields])) OR ("delivery of health care"[MeSH Terms] OR ("delivery"[All Fields] AND "health"[All Fields] AND "care"[All Fields]) OR "delivery of health care"[All Fields] OR "healthcare"[All Fields])) OR ("Medicines (Basel)"[Journal] OR "medicines"[All Fields])) OR ("pharmaceutical preparations"[MeSH Terms] OR ("pharmaceutical"[All Fields] AND "preparations"[All Fields]) OR "pharmaceutical preparations"[All Fields] OR "drugs"[All Fields])) OR ("pharmaceutical preparations"[MeSH Terms] OR ("pharmaceutical"[All Fields] AND "preparations"[All Fields]) OR "pharmaceutical preparations"[All Fields] OR "pharmaceuticals"[All Fields])) AND ((Access[All Fields] OR availability[All Fields] OR accessibility[All Fields])) AND (((((((((((("genetic therapy"[MeSH Terms] OR ("genetic therapy"[MeSH Terms] OR ("genetic"[All Fields] AND "therapy"[All Fields]) OR "genetic therapy"[All Fields] OR ("gene"[All Fields] AND "therapy"[All Fields]) OR "gene therapy"[All Fields])) OR ("genetic therapy"[MeSH Terms] OR ("genetic"[All Fields] AND "therapy"[All Fields]) OR "genetic therapy"[All Fields])) OR ("oncolytic virotherapy"[MeSH Terms] OR ("oncolytic"[All Fields] AND "virotherapy"[All Fields]) OR "oncolytic virotherapy"[All Fields] OR ("viral"[All Fields] AND "therapy"[All Fields]) OR "viral therapy"[All Fields])) OR (recombinant[All Fields] AND ("nucleic acids"[MeSH Terms] OR ("nucleic"[All Fields] AND "acids"[All Fields]) OR "nucleic acids"[All Fields] OR ("nucleic"[All Fields] AND "acid"[All Fields]) OR "nucleic acid"[All Fields])))) OR ("genetic therapy"[MeSH Terms] OR ("genetic"[All Fields] AND "therapy"[All Fields]) OR "genetic therapy"[All Fields] OR ("dna"[All Fields] AND "therapy"[All Fields]) OR "dna therapy"[All Fields])) OR ("dna, recombinant"[MeSH Terms] OR ("dna"[All Fields] AND "recombinant"[All

Fields)) OR "recombinant dna"[All Fields] OR ("recombinant"[All Fields] AND "dna"[All Fields])) OR (("nucleic acids"[MeSH Terms] OR ("nucleic"[All Fields] AND "acids"[All Fields]) OR "nucleic acids"[All Fields] OR ("nucleic"[All Fields] AND "acid"[All Fields]) OR "nucleic acid"[All Fields]) AND ("therapy"[Subheading] OR "therapy"[All Fields] OR "therapeutics"[MeSH Terms] OR "therapeutics"[All Fields])) OR (("rna"[MeSH Terms] OR "rna"[All Fields]) AND ("therapy"[Subheading] OR "therapy"[All Fields] OR "therapeutics"[MeSH Terms] OR "therapeutics"[All Fields])) OR ("gene transfer techniques"[MeSH Terms] OR ("gene"[All Fields] AND "transfer"[All Fields] AND "techniques"[All Fields]) OR "gene transfer techniques"[All Fields]) OR ("dna viruses"[MeSH Terms] OR ("dna"[All Fields] AND "viruses"[All Fields]) OR "dna viruses"[All Fields]) OR ("rna viruses"[MeSH Terms] OR ("rna"[All Fields] AND "viruses"[All Fields]) OR "rna viruses"[All Fields]) OR ("genetic vectors"[MeSH Terms] OR ("genetic"[All Fields] AND "vectors"[All Fields]) OR "genetic vectors"[All Fields] OR ("genetic"[All Fields] AND "vector"[All Fields]) OR "genetic vector"[All Fields]))
